# Supplementary material for: Formation of highly oxygenated organic molecules from α-pinene photooxidation: evidence for the importance of highly oxygenated alkoxy radicals
Source: Copernicus journal article supplement (doi:10.5194/egusphere-2025-2772), 2025-07-02
Supplement: Supplementary file [file egusphere-2025-2772-AC2-supplement.pdf]

We thank the reviewer for the helpful comments and responded to all comments. The reviewer comments are type set in italics while our responses are type set in plain Times New Roman fonts. In case of changes line numbers refer to the revised manuscript. In case of “no changes” line numbers refer to the submitted manuscript.

*With chamber oxidation experiments, Kang et al. show that bimolecular reactions of alpha-pinene + OH derived peroxy radicals with RO<sub>2</sub> and NO enhance the formation HOM by alkoxy-peroxy steps instead of inhibiting it as previously thought. RO<sub>2</sub> + NO reactions appear to be particularly important in this regard, leading to products with up to 15 oxygen atoms, three oxygens higher than experiments without NO. As they highlight in their conclusion, this would imply that the formation of HOM is more favorable under polluted conditions than clean, opposite to what is widely accepted in the community. This work is important, timely and highly relevant to the work of others in the field. I recommend its publication. I have the following comments that I request be addressed.*

We thank reviewer 2 for the positive words.

*1. One concern I have is the scarce measurement of the C<sub>10</sub>H<sub>17</sub>O<sub>x</sub> family of peroxy radicals. These first-generation peroxy radicals from OH addition to alpha-pinene are completely unmeasured, except for C<sub>10</sub>H<sub>17</sub>O<sub>10</sub>, while first-generation peroxy radicals from H-abstraction, a minor channel in comparison, are measured.*

We will respond in the following point by point.

- *It is clear from Xu et al. 2019 and Berndt 2021 that OH addition to alpha-pinene initiates autoxidation and the formation of peroxy radicals at least up to C<sub>10</sub>H<sub>17</sub>O<sub>7</sub>. Further reactions of some of these are likely the source of the C<sub>10</sub>H<sub>17</sub>O<sub>10</sub> measured here. Insensitivity of the NO<sub>3</sub>-CIMS method toward these products is unlikely to be the reason as Figure S5 in this paper shows that C<sub>10</sub>H<sub>15</sub>O<sub>6-9</sub> are measured above the detection limit.*

C<sub>10</sub>H<sub>17</sub>O<sub>X</sub> (X<10) are surely formed, but in our system apparently their concentrations remained below the detection limit, though a potential role of C<sub>10</sub>H<sub>17</sub>O<sub>X</sub> becomes evident as we find substantial amounts C<sub>20</sub>H<sub>34</sub>O<sub>Y</sub> accretion products. Why our system behaves differently is less obvious. Differences to Berndt's experiments are longer reaction times which would allow a larger contribution to C<sub>10</sub>H<sub>15</sub>O<sub>X</sub> by oxidation of first-generation products. Another difference is the presence of O<sub>3</sub>. However, Shen et al. (2021) found dominance of C<sub>10</sub>H<sub>15</sub>O<sub>X</sub> chemistry in absence of O<sub>3</sub>. In any case, an assumed significant O<sub>3</sub> contribution to C<sub>10</sub>H<sub>15</sub>O<sub>X</sub> should not suppress C<sub>10</sub>H<sub>17</sub>O<sub>X</sub> chemistry. Our explanation would be: a) Autoxidation of C<sub>10</sub>H<sub>17</sub>O<sub>X</sub> does not efficiently lead to HOM products with high oxygen number (O > 7, 8). (We are able to detect C<sub>10</sub>H<sub>17</sub>O<sub>X</sub> (Figure 6) and C<sub>10</sub>H<sub>18</sub>O<sub>X</sub> in the NO<sub>x</sub> experiments and monomer termination products C<sub>10</sub>H<sub>18</sub>O<sub>X</sub> in the OH reference experiments (Figure S7)). b) Autoxidation of C<sub>10</sub>H<sub>15</sub>O<sub>X</sub> (X>7) can be more efficient than autoxidation of C<sub>10</sub>H<sub>17</sub>O<sub>X</sub> (X>7). c) C<sub>10</sub>H<sub>17</sub>O<sub>X</sub> (X≤7) are at the edge of what we can detect with our Eisele style CIMS set up.

No action.

- *The authors attribute their low detection of C<sub>10</sub>H<sub>17</sub>O<sub>x</sub> compounds partly to their measurement conditions. While some secondary oxidation of pinonaldehyde could explain the C<sub>10</sub>H<sub>15</sub>O<sub>x</sub> compounds, the authors find primary products from OH H-abstraction to also be at least equally important (Figure S6). This necessitates a more detailed discussion regarding why primary OH-addition products, which should dominate α-pinene + OH reactions, are not measured or measured minimally. Perhaps*

*the additional -OH group in the latter leads more efficiently to termination during autoxidation, and these are then candidates for secondary oxidation by OH?*

We were apparently unable to express the intended conclusions clearly. In Figure S6 we show the turnover of  $\alpha$ -pinene by the different routes. We only show that, based on MCMv3.3.1 level chemistry, oxidation of  $C_{10}H_{16}O_Y$  compounds by OH is fast enough to explain in principle a part of the observed  $C_{10}H_{15}O_X$  chemistry. We do not claim it is pinonaldehyde. In the same sense also the channel of H-abstraction by OH has sufficient potential to explain (a part of) the observed  $C_{10}H_{15}O_X$  chemistry. That H-abstraction by OH exists as a minor oxidation channel for  $\alpha$ -pinene is well known. Here we would like to refer to the article by Shen et al. (2021) where it is shown that a minor channel of  $\alpha$ -pinene oxidation can be still a main path to HOM. A reason is that  $\alpha$ -pinene HOM, despite their importance for SOA, still have small chemical yields (<10%!). We cannot discriminate which routes are taken by measurement as this would require speciation.

No action.

- *Figure S5 shows multiple  $C_{10}H_{18}O_X$  measured. As the authors state in line 257 of the manuscript, these products can only from bimolecular reactions of  $C_{10}H_{17}O_X$  and  $C_{10}H_{17}O_{X+1}$  (correct the typo in the manuscript, you have two instances of  $C_{10}H_{17}O_{X+1}$ ). So, the  $C_{10}H_{17}O_X$  peroxy radical precursors of  $C_{10}H_{18}O_X$  clearly form during these experiments.*

We agree that  $C_{10}H_{17}O_X$  ( $X>7$ ) radicals must be of some importance as we see resulting products. Besides the  $C_{10}H_{34}O_Y$  accretion products, which result from recombination of two  $C_{10}H_{17}O_X$ , also some  $C_{10}H_{18}O_X$  compounds are observed as result from the alcohol channel of  $HOM-C_{10}H_{17}O_X + RO_2$  (or from  $HOM-C_{10}H_{17}O_X + HO_2$ ). However, the  $C_{10}H_{18}O_X$  family contributes only a small fraction of about 5% to the  $HOM-C_{10}$  monomers in OH reference experiment and of about 10% in the  $NO_X$  experiment.  $C_{10}H_{17}O_X$  contribute also to  $C_{20}H_{32}O_Y$  accretion products, but here it is not clear in how far these result from the recombination of  $HOM-C_{10}H_{15}O_X$  and conventional  $C_{10}H_{17}O_3$ , or form in the recombination of  $HOM-C_{10}H_{15}O_X$  and  $HOM-C_{10}H_{17}O_X$ .

Nevertheless, a low contribution of  $C_{10}H_{17}O_X$  chemistry to HOM formation compared to  $C_{10}H_{15}O_X$  chemistry is a finding, whereby “low” refers to primary oxidation chemistry where  $C_{10}H_{17}O_3$  dominate to > 80%. We stated clearer that we cannot finally clarify what the detailed reasons are, based on the data presented:

Action:

Typo corrected.

In manuscript we added to Section 3.1, line 411 - 413:

“Despite the line of arguments above, we are not able to finally clarify why we observe only a minor contribution of  $C_{10}H_{17}O_X$  chemistry to HOM formation in our experiments. It had at least some significance as indicated by the observed termination products  $C_{10}H_{18}O_Y$  and  $C_{10}H_{32,34}O_Y$ .”

We would prefer not to go deeper into this mechanistic discussion in the present manuscript. For the main topic of the paper - the role of alkoxy-peroxy steps in the autoxidation chain – the question why the contribution of  $C_{10}H_{17}O_X$  is minor is not so important. In Figure 6 we show that the  $C_{10}H_{17}O_X$  peroxy radical family shows a similar behavior as a function of  $NO_X$  as the  $C_{10}H_{15}O_X$  peroxy radical family. Hence, alkoxy-peroxy steps may keep also  $C_{10}H_{17}O_X$  on a high level at high  $NO_X$  (in accordance with Berndt et al. (2015)).

*2. In addition to the reaction classes described by the authors, some of the products could form from  $RO_2 + OH$  reaction producing trioxides ( $ROOOH$ ) (Assaf et al.). This reaction could be*

particularly important under the elevated OH conditions of the experiments carried out here. The importance of this reaction should perhaps be modelled out.

Yes, we agree that  $\text{RO}_2 + \text{OH}$  should be mentioned in the manuscript.

- Related, could the increase in  $\text{C}_{10}\text{H}_{15}\text{O}_{2n+1}$  signals at elevated levels of OH (line 420) be attributed in some part to the  $\text{RO}_2 + \text{OH} \Rightarrow \text{ROOOH} \Rightarrow \text{RO} + \text{HO}_2$  (and not just  $\text{HOM-RO}_2 + \text{RO}_2$  as currently stated)?

The rate coefficient of the  $\text{RO}_2 + \text{OH}$  reaction was determined to about  $1.5 \cdot 10^{-11} \text{ cm}^3 \text{ s}^{-1}$  (see summary paper by Fittschen in ChemPhysLett (2019)). For larger molecules it was theoretically calculated that  $>>90\%$  form the ROOOH adduct (Assaf et al. 2018). From these numbers it follows that  $k_{\text{RO}_2+\text{OH}}[\text{OH}]_{\text{ss}}$  is of the order of  $7.5 \cdot 10^{-3} \text{ s}^{-1}$  for  $[\text{OH}]_{\text{ss}} = 5 \cdot 10^7 \text{ cm}^{-3}$  in the OH reference experiments and  $1.1 \cdot 10^{-2} \text{ s}^{-1}$  for  $[\text{OH}]_{\text{ss}} = 7 \cdot 10^7 \text{ cm}^{-3}$  in the  $\text{NO}_x$  experiments.

A comparison of  $\text{RO}_2 + \text{OH}$  (magenta crosses) to all other channels is demonstrated in the following Figure in style of Figure 9.

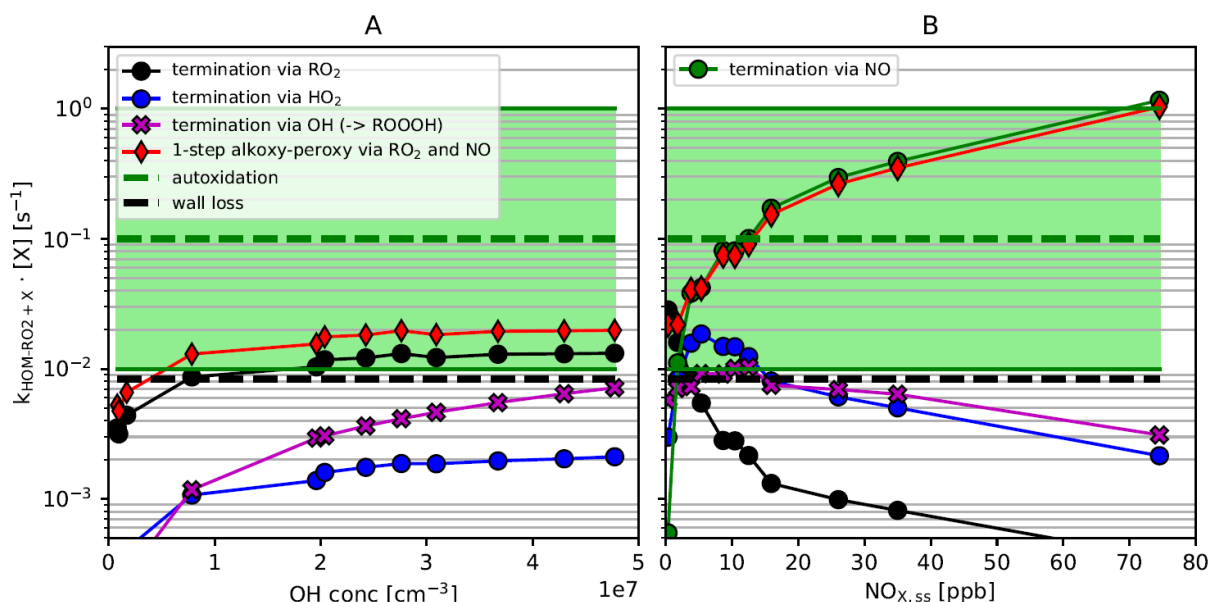

For the JO1D experiments this means that ROOOH adduct formation could be probably more important than  $\text{RO}_2 + \text{HO}_2$ , therefore it could contribute to  $\text{C}_{10}\text{H}_{16}\text{O}_x$ . But even at the highest  $[\text{OH}]_{\text{ss}}$  applied during these experiments  $\text{RO}_2 + \text{RO}_2$  is still about a factor of two faster. In the  $\text{NO}_x$  case  $\text{RO}_2 + \text{OH}$  could be more important than  $\text{RO}_2 + \text{RO}_2$ . However, it is still about a factor of two slower than  $\text{RO}_2 + \text{HO}_2$  at  $[\text{NO}_x]_{\text{ss}} < 8 \text{ ppb}$ . At  $[\text{NO}_x]_{\text{ss}} > 8 \text{ ppb}$ ,  $\text{RO}_2 + \text{NO}$  is dominant. Lifetime of ROOOH with respect to unimolecular decay is estimated to about 5000-10000 s. From these numbers it could be indeed true that  $\text{RO}_2 + \text{OH}$  has some influence. If all findings for small molecules are applicable to highly functionalized HOM- $\text{RO}_2$ , the reaction  $\text{RO}_2 + \text{OH}$  can contribute to formation of molecules of the  $\text{C}_{10}\text{H}_{16}\text{O}_x$  and the  $\text{C}_{10}\text{H}_{18}\text{O}_x$  families.

For the topic of our paper the minor path alkoxy-radical formation,  $\text{RO}_2 + \text{OH} \rightarrow \text{RO} + \text{HO}_2$ , would be more interesting, but this is obviously unimportant for larger molecules. Although  $\text{RO}_2 + \text{OH}$  should be investigated as a potential path to  $\text{C}_{10}\text{H}_{16}\text{O}_x$  in mechanistic oriented papers, for our purpose to make aware of the alkoxy isomerization as carrier of the autoxidation/radical chain it is not so interesting. We would strongly prefer not to discuss the potential issues of  $\text{RO}_2 + \text{OH} = \text{ROOOH}$  for HOM formation in general here, because it is beyond the scope of this already lengthy paper.

We will mention the  $\text{RO}_2 + \text{OH}$  reaction and stable trioxide formation in the Introduction (line 75 - 77):

“Recent studies indicate that  $\text{RO}_2\cdot$  could also react with  $\text{OH}\cdot$  radicals (summarized in Fittschen, 2019). Theoretical calculations suggest that larger peroxy radicals could form stable trioxides under atmospheric conditions, while formation of alkoxy radicals is negligible (Assaf et al., 2018).”

and in Method section 2.4 (line 24 - 242):

“Reaction of  $\text{HOM-RO}_2\cdot$  with  $\text{OH}\cdot$  (Assaf et al., 2018; Fittschen, 2019) could contribute somewhat to the HOM-termination products at our reaction conditions but it will not be considered, since it cannot compete with the particular major termination pathways in the experiments.”

- *This mechanism could also explain in part the CO experiments. In the absence of CO, higher OH concentrations can lead to  $\text{C}_{10}\text{H}_{15}\text{O}_{2n+1}$  products via the ROOOH pathway above, which switches in the presence of CO when OH concentrations are lower. The trioxide does get more stable against decomposition with the increase in carbon chain length, so the contribution of the channel is perhaps minimal.*

A similar consideration as in the previous response shows that in the CO case at  $[\text{OH}] = 1 \cdot 10^7 \text{ cm}^{-3}$ ,  $\text{RO}_2 + \text{OH}$  cannot significantly compete with  $\text{HOM-RO}_2 + \text{HO}_2$  and  $\text{HOM-RO}_2 + \text{RO}_2$ .

No action.

*3. About the  $\text{C}_{10}\text{H}_{16}\text{O}_7$  signal in page 10 which dominates the  $\text{C}_{10}\text{H}_{16}\text{O}_x$  family in their measurements, the authors state that the contribution to this signal from  $\text{C}_{10}\text{H}_{17}\text{O}_x$  is low (line 351). Does the majority of the  $\text{C}_{10}\text{H}_{16}\text{O}_7$  signal measured then come from reactions of  $\text{C}_{10}\text{H}_{15}\text{O}_x$ ? Maybe provide additional details regarding the reactions that are likely involved, whether R2 or R3b or something else. If it's R2, does  $[\text{HO}_2]$  explain the measured intensity?*

The purpose of these lines was to make it plausible that  $\text{C}_{10}\text{H}_{17}\text{O}_x$  peroxy radicals likely did not end up in  $\text{C}_{10}\text{H}_{16}\text{O}_7$ , so they are not trapped specifically in this compound. As a consequence,  $\text{C}_{10}\text{H}_{16}\text{O}_7$  must arise from  $\text{C}_{10}\text{H}_{15}\text{O}_8 + \text{RO}_2$  or  $\text{C}_{10}\text{H}_{15}\text{O}_7 + \text{HO}_2$ . Both, HOM peroxy radicals have large abundances. The high concentration and the fast increase with turnover by OH indicate an efficient termination reaction. For the latter a missing  $\text{HO}_2$  source in the model calculations would help, as discussed in the supplement. (To continue the discussion on comment 2: the contribution of the reaction  $\text{HOM-RO}_2 + \text{OH} \rightarrow \text{HOM-ROOOH}$  is small since  $\text{C}_{10}\text{H}_{15}\text{O}_6$  is relatively small.)

Action:

We will add to the manuscript, Section 3.1, line 370 -372):

“ $\text{C}_{10}\text{H}_{16}\text{O}_7$  is thus likely formed from  $\text{C}_{10}\text{H}_{15}\text{O}_8$  or  $\text{C}_{10}\text{H}_{15}\text{O}_7$  which show high abundances (Fig. S5). The large contribution of  $\text{C}_{10}\text{H}_{16}\text{O}_7$  to the  $\text{C}_{10}\text{H}_{16}\text{O}_x$  family indicates specifically efficient termination reactions of  $\text{C}_{10}\text{H}_{15}\text{O}_8 + \text{RO}_2$  or  $\text{C}_{10}\text{H}_{15}\text{O}_7 + \text{HO}_2$ .”

*4. Lines 415-419:  $\text{C}_{10}\text{H}_{15}\text{O}_6$  can form from  $\alpha$ -pinene ozonolysis. In fact, Meder et al. 2025 cited here measure multiple isomers of this peroxy radical. Also, consider a different word than “unimportant” in line 419.  $\text{C}_{10}\text{H}_{15}\text{O}_6$  is crucial to formation of the next peroxy radical in the autoxidation chain,  $\text{C}_{10}\text{H}_{15}\text{O}_8$ . It can also react bimolecularly to form the closed-shell  $\text{C}_{10}\text{H}_{14}\text{O}_5$  species, as reported in Meder et al.*

We agree with the reviewer, our formulations are unlucky and misleading.

First, we would like to state that the concentration of  $\text{C}_{10}\text{H}_{15}\text{O}_6$  is low in our dark case (60% ozonolysis / 40% OH) but not zero. It increases with OH, which means at least one  $\text{C}_{10}\text{H}_{15}\text{O}_6$  isomer must have a strong OH related source, as stated in the manuscript.

However, a low concentration of an intermediate is indeed not equivalent to being unimportant. Iyers et al. (2021) suggested that  $C_{10}H_{15}O_6$  is rapidly converted to  $C_{10}H_{15}O_8$ , which would explain the small concentration and relatively high  $C_{10}H_{15}O_8$  concentrations at the same time. Meder et al. (2025) discuss the relative importance of different abstraction pathways. Meder et al. supported the mechanism proposed by Iyers et al. (2021) as it can explain a part of the observed H-abstraction behavior leading to  $C_{10}H_{15}O_6$ . However, Meder et al. also state that Iyers' mechanism cannot explain all H-abstraction pathways they observe, which indicates involvement of different  $C_{10}H_{15}O_6$  isomers. In our opinion,  $C_{10}H_{15}O_6$  isomers could also arise in Meder's experiments from (dark) OH, as they did, like us, not quench OH in their experiments. Insofar we agree with Iyers and Meder, however, in different aspects.

Action:

We modified the sentence in Section 3.2.1 (line 441 – 444) and avoided the notation “unimportant”.

“This observation is consistent with the HOM pathways in  $\alpha$ -pinene ozonolysis proposed by Iyer et al. (2021) wherein an efficient 1,4 shift to  $C_{10}H_{15}O_8$  should lead to a small concentration of  $C_{10}H_{15}O_6$  in bare ozonolysis. The fraction of  $C_{10}H_{15}O_6$ , which in Meder's et al. (2023, 2025) experiments could not be explained by the Iyer mechanism, could arise in parts from dark OH as in our experiments.”

*5. Regarding the effect of CO on the formation of HOM RO, the authors cite Jenkin et al. 2019 to say that the branching to alkoxy radicals from  $RO_2 + HO_2$  reactions should be low (line 464). However, this is highly dependent on the structure of the R. According to Jenkin et al., there is an almost 50:50 branching towards ROOH and RO for beta-oxo peroxy radicals (Table 8 in Jenkin et al 2019). The authors should discuss the importance of the  $RO_2 + HO_2$  reaction in the context of the structures of the Rs in their system.*

We agree with the reviewer that the result of the CO experiment looks a bit more complex than simply replacing  $RO_2$  by  $HO_2$ , although the overall trend is suppression of the alkoxy-peroxy paths (parity change). If  $HOM-RO_2 + HO_2$  would be an important source of  $HOM-RO$ , the oxygen parity should behave like in the OH reference experiment or like in the  $NO_x$  experiments. This is, however, not the case. Parity change is reduced in the presence of enhanced  $HO_2$ , which indicates that  $HOM-RO$  is suppressed compared to reaction with  $RO_2$ . Secondly, we agree with the reviewer that the structure of R is key for (the rate of) isomerization. Regarding the structure of R in  $HOM-RO_2$  and potential  $HOM-RO$  formation by  $HO_2$ , we agree that there may be isomers with significant tendency to form alkoxy radicals. However, we have no direct handle on the structure R of isomers in this study, since we applied HR mass spectrometry, which provides only chemical formulas. The advantage of HR-MS is that we can observe the time evolution or here the steady state abundance of several  $HOM-RO_2$  simultaneously. Therefore we probably capture a variation of Rs. Our approach assumes that there are structure isomers represented in the pool of intermediates with the reactant formula that have the ability to form the hydroperoxide in reaction with  $HO_2$ . While there may be also isomers that are able to form a significant fraction  $HOM-RO$ , which we don't know. This would overall mostly shift the chemistry somewhat between termination and autoxidation within a rather large uncertainty envelope.

Action:

We added a remark to the Introduction (line 89 - 90):

“For specific peroxy radicals even reaction with  $HO_2$  can lead to significant branching into alkoxy formation (Jenkins et al. 2019).”

and made clearer in section 3.2.2. (line 507 - 509) that we do not exclude contribution of RO from  $HO_2$ :

“Regarding the reaction  $HOM-RO_2 + HO_2$  (R9) a production of  $HOM-RO$  cannot be excluded; it seems to be less efficient than  $HOM-ROOH$  formation (R2), though.”

6. How does the decrease in  $[OH]$  from CO addition affect the RO<sub>2</sub> intensities and distribution? In line 494 the authors put the onus of HOM-RO<sub>2</sub> suppression completely on HOM-RO<sub>2</sub> + HO<sub>2</sub> reactions, but how much of the suppression is due to lower  $[OH]$ ?

We choose for this comparison experiments with a similar turnover with and without CO, therefore the primary production of RO<sub>2</sub> is about the same. We do therefore not expect a large effect on the distribution of R of the RO<sub>2</sub> radicals starting the autoxidation. Since production is about the same it must be the enhanced sink by HO<sub>2</sub> that leads to overall reduction of HOM-RO<sub>2</sub>. (Further, we did not claim in line 494f that the suppression is *completely* due to enhanced  $[HO_2]$ .)

In summary, the enhanced importance of HOM-RO<sub>2</sub>· + HO<sub>2</sub>· reactions compared to HOM-RO<sub>2</sub>· + RO<sub>2</sub>· reactions in the CO experiment led to suppression in the abundance of HOM-RO<sub>2</sub>· radicals as well as fragmented compounds related to alkoxy steps.

Action:

We modified the sentence (Section 3.2.2. line 521 -523):

“In summary, the enhanced importance of HOM-RO<sub>2</sub>· + HO<sub>2</sub>· reactions compared to HOM-RO<sub>2</sub>· + RO<sub>2</sub>· reactions in the CO experiment led to a general suppression of the abundance of HOM-RO<sub>2</sub>·. Hereby concentrations of HOM-C<sub>10</sub>H<sub>15</sub>O<sub>2n+1</sub> and fragmented compounds which are related to alkoxy steps were disproportionally stronger suppressed.”

7. The increase in C<sub>10</sub>H<sub>15</sub>O<sub>x</sub> signals with the increase in NO<sub>x</sub>: is there a possibility that some ozone is forming from NO<sub>2</sub> photolysis? If I understand the method section correctly, UV-A lights are on during these experiments, so won't NO<sub>2</sub> photolysis increase O<sub>3</sub> concentrations, explaining at least partly, the observed increase in C<sub>10</sub>H<sub>15</sub>O<sub>x</sub> signals?

Yes, we agree that NO<sub>x</sub> chemistry affects the O<sub>3</sub> steady state concentrations. In our experiments, we observed net destruction as well as production of O<sub>3</sub> depending on  $[NO_x]_{ss}$ . For our calculations, we used always the steady state concentration of O<sub>3</sub> as measured (Table S1), insofar NO<sub>x</sub> related changes in O<sub>3</sub> are already considered. In the NO<sub>x</sub> experiments, turnover is dominated by 90% by OH despite high  $[O_3]_{ss}$ ; even in the experiment with the highest NO<sub>x</sub>, it is still 86%. Moreover, RO<sub>2</sub> production is much more efficient in OH photochemistry compared to RO<sub>2</sub> production from O<sub>3</sub> (vinylhydroperoxide path). In any case, for the measured NO concentration >8 ppb, reaction by NO is the dominant fate of peroxy radicals. So, a little stronger RO<sub>2</sub> source from O<sub>3</sub> cannot explain the relatively high levels of C<sub>10</sub>H<sub>15</sub>O<sub>x</sub> with increasing NO<sub>x</sub>. Moreover, O<sub>3</sub> related HOM-RO<sub>2</sub> would react with NO in the same way as OH generated HOM-RO<sub>2</sub>. Of course O<sub>3</sub> related peroxy radicals will also undergo the alkoxy-peroxy steps (Mentel et al. 2015). In addition, as shown in Figure 9, C<sub>10</sub>H<sub>17</sub>O<sub>x</sub>, which are not formed by O<sub>3</sub>, also survive at high NO<sub>x</sub>. All this indicates that for HOM-RO<sub>2</sub> an extra source must exist compared to conventional RO<sub>2</sub>. And our suggestion is that it is alkoxy-isomerization under preservation of the carbon backbone.

No action

Assaf, E., Schoemaeker, C., Vereecken, L. and Fittschen, C., 2018. Experimental and theoretical investigation of the reaction of RO<sub>2</sub> radicals with OH radicals: Dependence of the HO<sub>2</sub> yield on the size of the alkyl group. *International journal of chemical kinetics*, 50(9), pp.670-680

**Citation:** <https://doi.org/10.5194/egusphere-2025-2772-RC2>
